# Supplementary material for: A “Special” Solvent to Prepare Alloyed Pd2Ni1 Nanoclusters on a MWCNT Catalyst for Enhanced Electrocatalytic Oxidation of Formic Acid
Source: MDPI journal article supplement (doi:10.3390/nano13040755), 2023-02-17
Supplement: s1 [file s1]

## Supporting Information

# A “Special” Solvent to Prepare Alloyed Pd<sub>2</sub>Ni<sub>1</sub> Nanoclusters on a MWCNT Catalyst for Enhanced Electrocatalytic Oxidation of Formic Acid

Pingping Yang <sup>1,2,†</sup>, Li Zhang <sup>1,2,†</sup>, Xuejiao Wei <sup>1</sup>, Shiming Dong <sup>1</sup>, Wenting Cao <sup>1</sup>, Dong Ma <sup>1</sup>, Yuejun Ouyang <sup>1</sup>,  
Yixi Xie <sup>2,\*</sup>, and Junjie Fei <sup>2,\*</sup>

<sup>1</sup> College of Chemistry and Materials Engineering, Huaihua University; Huaihua, 418008, Hunan, China yangpingping0218@163.com (P.Y.); zhanglicsu2013@163.com (L.Z.); wei1348137@163.com (X.W.); dsm20032022@163.com (S.D.); cwt1822707678@163.com (W.C.); md12341110@163.com (D.M.); oyyj0816@163.com (Y.O.)

<sup>2</sup> College of Chemistry, Xiangtan University, Xiangtan 411105, Hunan, China

\* Correspondence: xieyixige@xtu.edu.cn (Y.X.); fei\_junjie@xtu.edu.cn (J.F.)

† These authors contributed equally to the work.

## Table of Contents:

### 1. Calculate details

The calculation details are as follows:

“To calculate the average particle size of the alloy, we used ImageJ software to calculate. Firstly, select a TEM image with enough sample size of 100 nm scale bar, enlarge the TEM image to a size that is conducive to measuring the particle size, draw a straight line on the scale bar using the line measurement tool, and calibrate the line to the length of 100 nm of the scale bar; then use the linear measurement tool to randomly measure the particle size of 200 samples in the image; finally, calculate the average particle size of 200 samples. Here we have also added part of the original text: To measure the particle size of the alloy, 200 random samples were chosen from the TEM images.” (Paragraph 1 of support information part)

The average size of the alloy particles was calculated to be 3.6 nm (Pd<sub>2</sub>Ni<sub>1</sub>/CNTs) and 4.1 nm (Pd/CNTs).

### 2. Supplementary Figures

**Figure S1.** The corresponding particle size distribution of Pd/CNTs.

**Figure S2.** TEM and HRTEM images of Pd/CNTs.

**Figure S3.** EDX line-profiles (a), spot scanning (b) of Pd<sub>2</sub>Ni<sub>1</sub> nanoparticle (where Pd is in red and Ni in blue) of Pd<sub>2</sub>Ni<sub>1</sub>/CNTs.

**Figure S4.** TEM images and size distribution histograms of Pd<sub>2</sub>Ni<sub>1</sub>/CNTs (A, B) and Pd/CNTs (C, D) after the current-time measurements in 1.0 M HCOOH + 0.5 M H<sub>2</sub>SO<sub>4</sub> solution.

### 3. Supplementary Tables

**Table S1.** Elemental composition of the samples obtained from ICP.

**Table S2** A recent literatures survey of the activity of FAOR electrocatalysts.

**Table S3.** Pd 3d peaks of Pd<sub>2</sub>Ni<sub>1</sub>/CNTs and Pd/CNTs.

### 4. Supplementary References

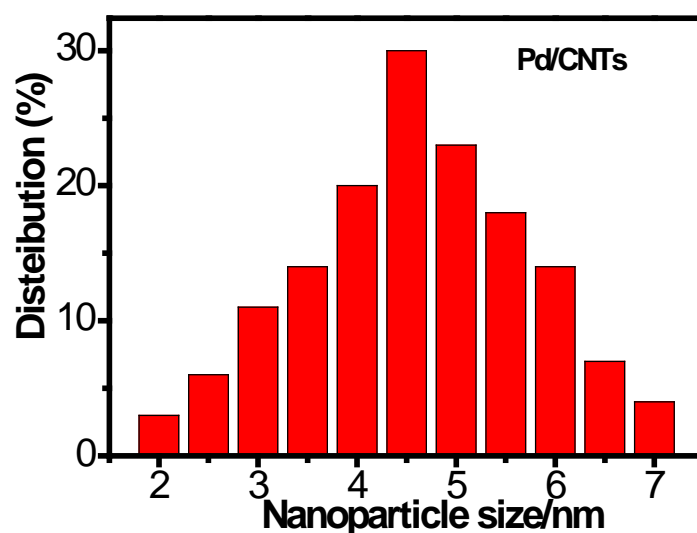

**Figure S1.** The corresponding particle size distribution of Pd/CNTs.

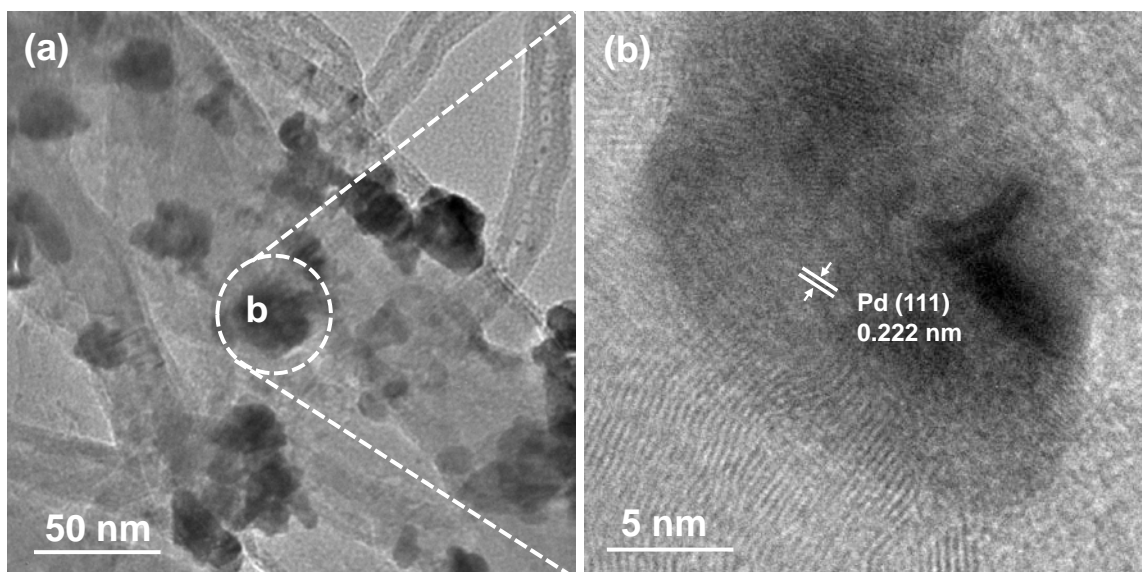

**Figure S2.** TEM (a) and HRTEM (b) images of Pd/CNTs catalyst.

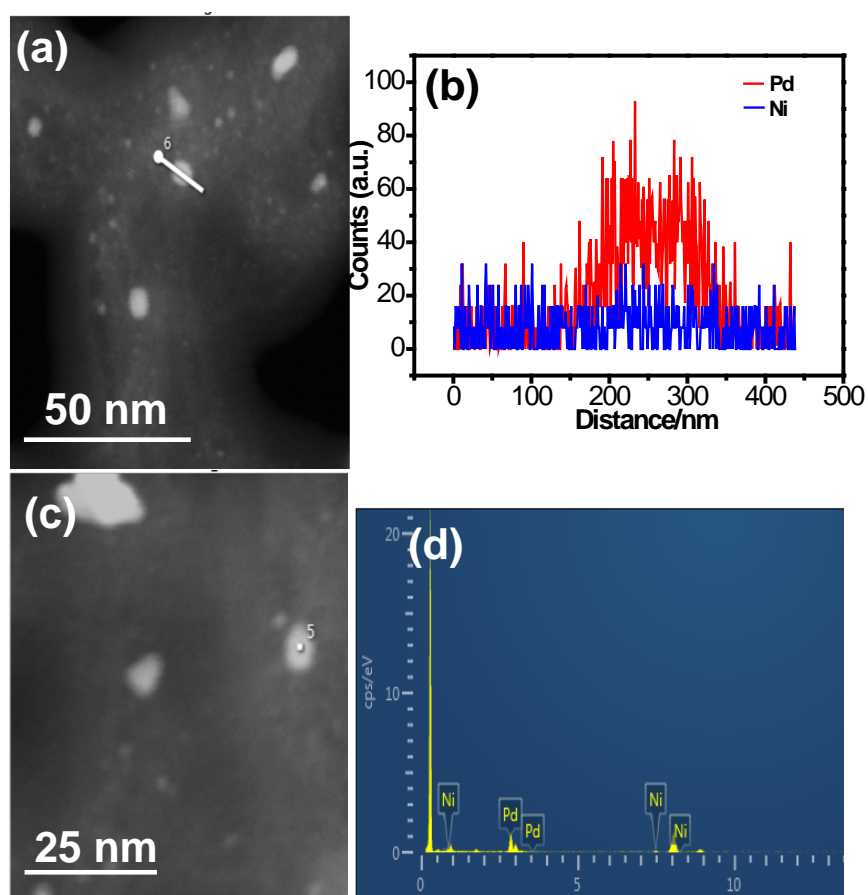

**Figure S3.** EDX line-profiles (a, b), spot scanning (c, d) of a Pd<sub>2</sub>Ni<sub>1</sub> nanocluster (where Pd is in red and Ni in blue).

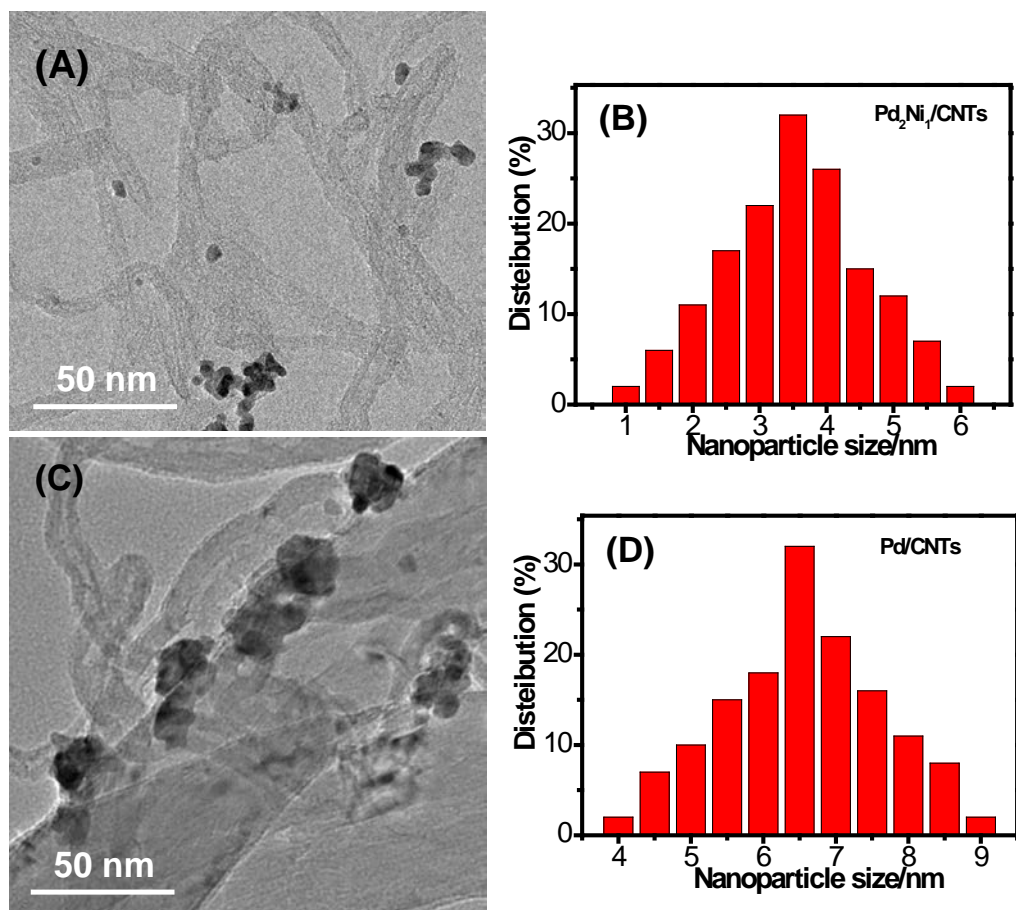

**Figure S4** TEM images and size distribution histograms of Pd<sub>2</sub>Ni<sub>1</sub>/CNTs (A, B) and Pd/CNTs (C, D) after the current-time measurements in 1.0 M HCOOH + 0.5 M H<sub>2</sub>SO<sub>4</sub> solution.

**Table S1.** Pd 3d peaks of Pd<sub>2</sub>Ni<sub>1</sub>/CNTs and Pd/CNTs.

| Catalysts                             | Pd <sup>0</sup> 3d <sub>5/2</sub><br>(eV) | Pd <sup>0</sup> 3d <sub>3/2</sub><br>(eV) | Pd <sup>2+</sup> 3d <sub>5/2</sub><br>(eV) | Pd <sup>2+</sup> 3d <sub>3/2</sub><br>(eV) |
|---------------------------------------|-------------------------------------------|-------------------------------------------|--------------------------------------------|--------------------------------------------|
| Pd <sub>2</sub> Ni <sub>1</sub> /CNTs | 335.6                                     | 340.8                                     | 336.0                                      | 341.5                                      |
| Pd/CNTs                               | 335.8                                     | 336.6                                     | 341.2                                      | 341.6                                      |

**Table S2** a recent literatures survey of the activity of FAOR electrocatalysts.

| <b>Catalysts</b>                         | <b>Mass activity<br/>(mA mg<sup>-1</sup> Pd )</b> | <b>References</b> |
|------------------------------------------|---------------------------------------------------|-------------------|
| <b>Pd<sub>2</sub>Ni<sub>1</sub>/CNTs</b> | <b>3351.6</b>                                     | <b>This work</b>  |
| PdCo nanodots                            | 1362.1                                            | [1]               |
| PdCu nanochains                          | 1108.2                                            | [2]               |
| PdCu clusters                            | 1289.0                                            | [3]               |
| coral-like PdCu                          | 1050.0                                            | [4]               |
| Pd <sub>6</sub> Co nanocrystals          | 430.8                                             | [5]               |
| PdCu nanoparticles                       | 194.5                                             | [6]               |
| (3D) porous PdSn                         | 553.4                                             | [7]               |
| PdCu porous network                      | 517.0                                             | [8]               |
| PdFe nanoparticles                       | 1000.0                                            | [9]               |
| PdCu/CNTs                                | 252.0                                             | [10]              |

**Table S3.** Elemental composition of the samples obtained from ICP.

| <b>Elements<br/>Catalysts</b>         | <b>Pd(wt.%)</b> | <b>Ni(wt.%)</b> | <b>Atomic ratios</b> |
|---------------------------------------|-----------------|-----------------|----------------------|
| Pd <sub>2</sub> Ni <sub>1</sub> /CNTs | 18.6            | 9.31            | 2:1                  |
| Pd <sub>1</sub> Ni <sub>1</sub> /CNTs | 19.2            | 17.8            | 1:1                  |
| Pd <sub>1</sub> Ni <sub>2</sub> /CNTs | 19.6            | 38.1            | 1:2                  |
| Pd/CNTs                               | 16.3            | -               | -                    |

## References

- [1] Zhang. L-Y, et al. Palladium-cobalt nanodots anchored on graphene: In-situ synthesis, and application as an anode catalyst for direct formic acid fuel cells. *Appl Surf Sci* 2019, 469, 305-311.
- [2] Zhang. L-Y, et al. Twisted palladium-copper nanochains toward efficient electrocatalytic oxidation of formic acid. *J Colloid Interf Sci* 2019, 537, 366-374.
- [3] Zhang. Z, et al. Facile fabrication of stable PdCu clusters uniformly decorated on graphene as an efficient electrocatalyst for formic acid oxidation. *Int J Hydrog Energ* 2019, 44, 2731-2740.
- [4] Zheng J, et al. Coral-like PdCu Alloy Nanoparticles Act as Stable Electrocatalysts for Highly Efficient Formic Acid Oxidation. *ACS Sustain Chem Eng* 2019, 7, 15354-15360.
- [5] Zhang. L-Y, et al. Facile one-pot surfactant-free synthesis of uniform Pd<sub>6</sub>Co nanocrystals on 3D graphene as an efficient electrocatalyst toward formic acid oxidation. *Nanoscale* 2016, 8, 1905-1909.
- [6] Wang. L, et al. Pd-Cu/C electrocatalysts synthesized by one-pot polyol reduction toward formic acid oxidation: Structural characterization and electrocatalytic performance. *Inter J Hydrog Energ*. 2015, 40, 1726-34.
- [7] Sun. D-D, et al. Nanobranched porous palladium-tin intermetallics: One-step synthesis and their superior electrocatalysis towards formic acid oxidation. *J Power Sources* 2015, 280, 141-146.
- [8] Yang. F, et al. Pd-Cu alloy with hierarchical network structure as enhanced electrocatalysts for formic acid oxidation. *Inter J Hydrog Energ* 2016, 41, 6773-6780.
- [9] Feng. A-N, et al. Surfactant-free Pd-Fe nanoparticles supported on reduced graphene oxide as nanocatalyst for formic acid oxidation. *Inter J Hydrog Energ* 2017, 42, 15196-15202.
- [10] Zhu. F-C, et al. High activity of carbon nanotubes supported binary and ternary Pd-based catalysts for methanol, ethanol and formic acid electro-oxidation. *J Power Sources* 2013, 242, 610-20.
